# Supplementary material for: Self-cleaning and fully polymer-based super-moisture-resistant gas barrier coating films with 2D polymers for flexible electronic devices and packaging applications
Source: Royal Society of Chemistry journal article supplement (doi:10.1039/d3tc02538a), 2023-01-01
Supplement: d3tc02538a1.pdf [file d3tc02538a1.pdf]

## Supporting information

### **Self-cleaning and fully polymer-based super moisture-resistant gas barrier coating films with 2D polymer for flexible electronic devices and packaging applications**

*Sadiq Mahmood,<sup>a,c,d</sup> Nadeem Ahamad,<sup>b</sup> Chandra Kant,<sup>c,d</sup> Amir Khan,<sup>b</sup> Pu-Wei Wu,<sup>b</sup> Wen-Bin Jian,<sup>e</sup> Chih Wei Chu,<sup>f</sup> Monica Katiyar,<sup>c,d,\*</sup> Hong-Cheu Lin<sup>a,b,g,\*</sup>*

*<sup>a</sup> International College of Semiconductor Technology, National Yang Ming Chiao Tung University, Hsinchu 300, Taiwan*

*<sup>b</sup> Department of Materials Science and Engineering, National Yang Ming Chiao Tung University, Hsinchu 300, Taiwan*

*<sup>c</sup> Materials Science and Engineering Department, Indian Institute of Technology Kanpur, India*

*<sup>d</sup> National Centre for Flexible Electronics, Indian Institute of Technology Kanpur, India*

*<sup>e</sup> Department of Electrophysics, National Yang Ming Chiao Tung University, Hsinchu 300, Taiwan*

*<sup>f</sup> Research Center for Applied Sciences, Academia Sinica, Taipei, 11529, Taiwan*

*<sup>g</sup> Center for Emergent Functional Matter Science, National Yang Ming Chiao Tung University, Hsinchu 300, Taiwan*

\*Corresponding authors: [mk@iitk.ac.in](mailto:mk@iitk.ac.in)

[linhc@nycu.edu.tw](mailto:linhc@nycu.edu.tw)

## 1. Synthesis and characterization of 2D polymer

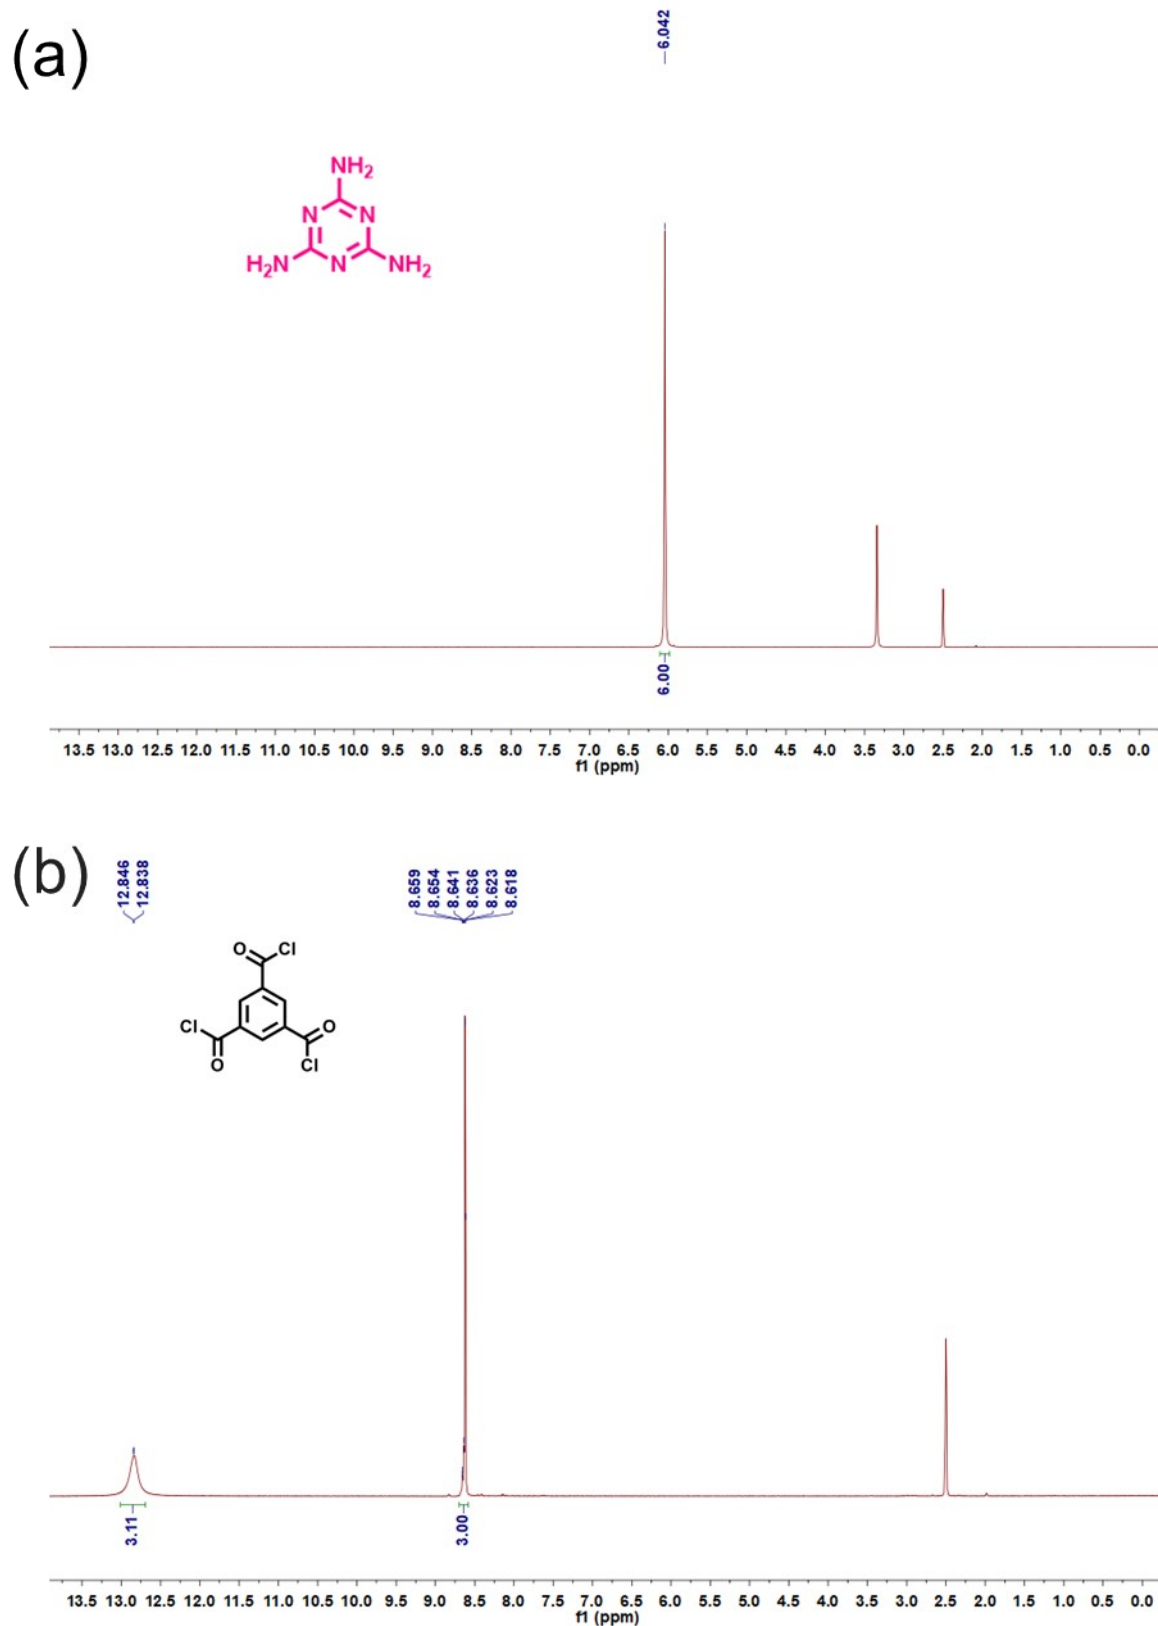

**Fig. S1**  $^1\text{H}$  NMR spectrum (500 MHz, 298K,  $\text{DMSO-d}_6$ ) of monomers (a) melamine and (b) trimesic acid trichloride.

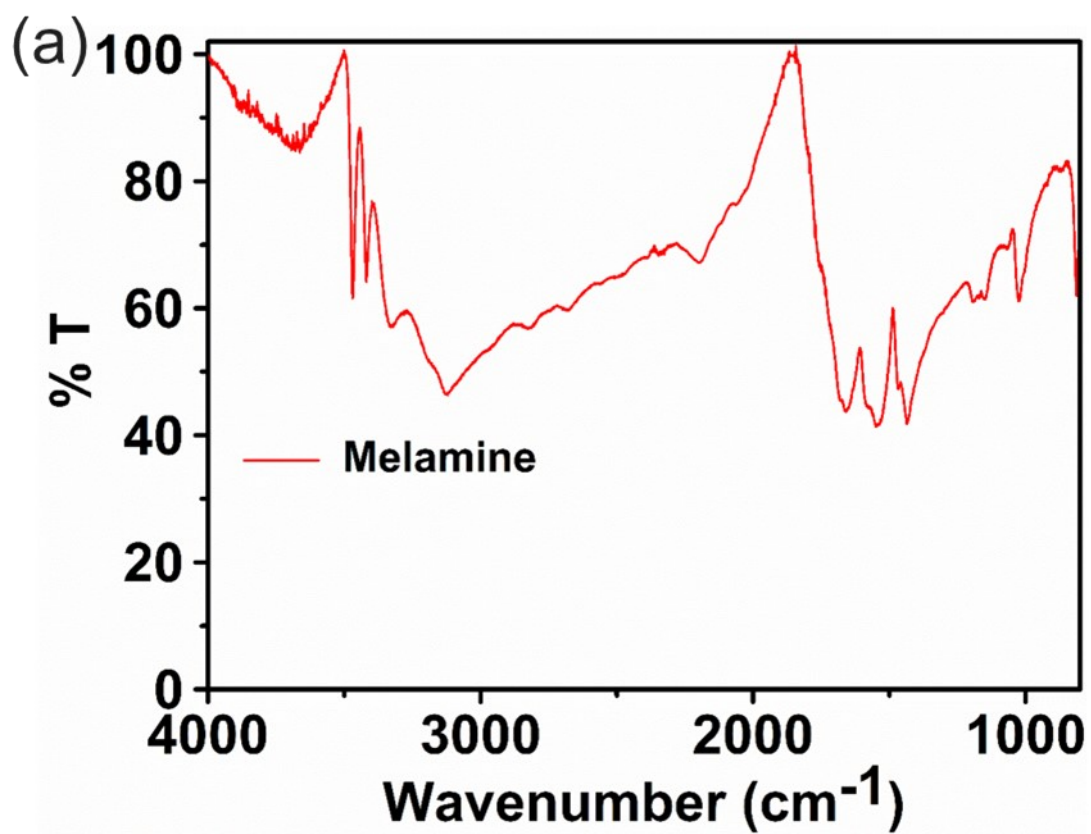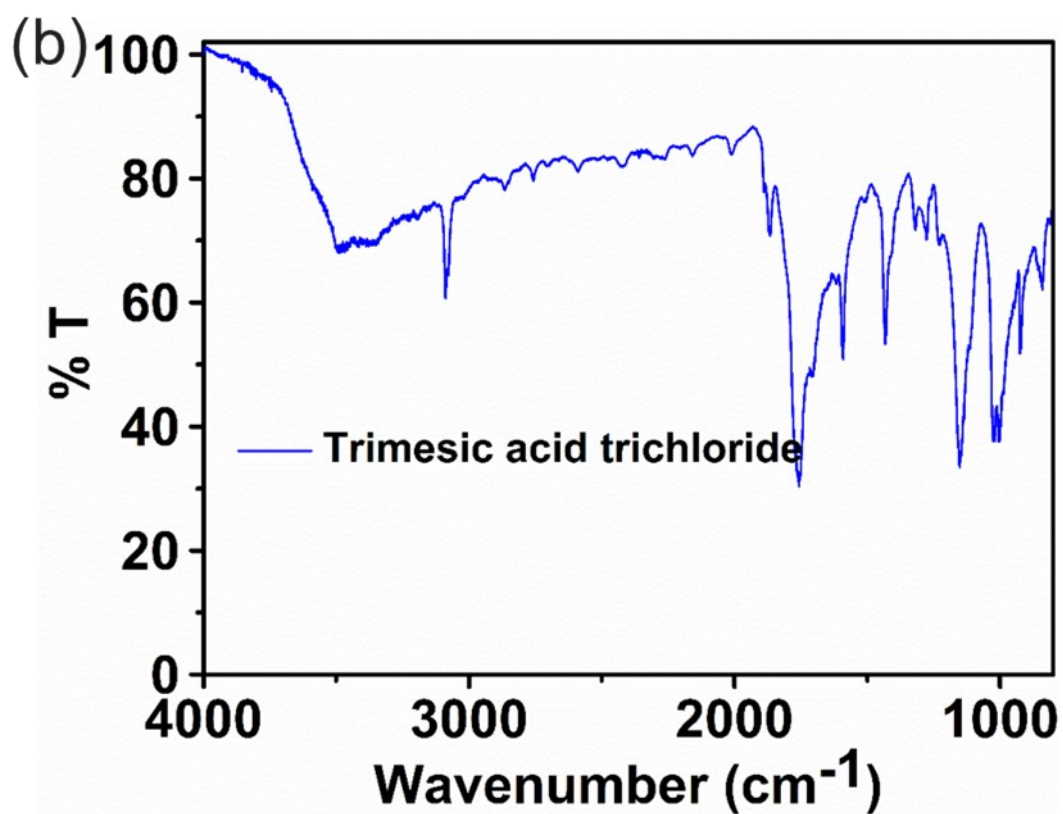

Fig. S2 FTIR spectrum of monomers (a) melamine and (b) trimesic acid trichloride.

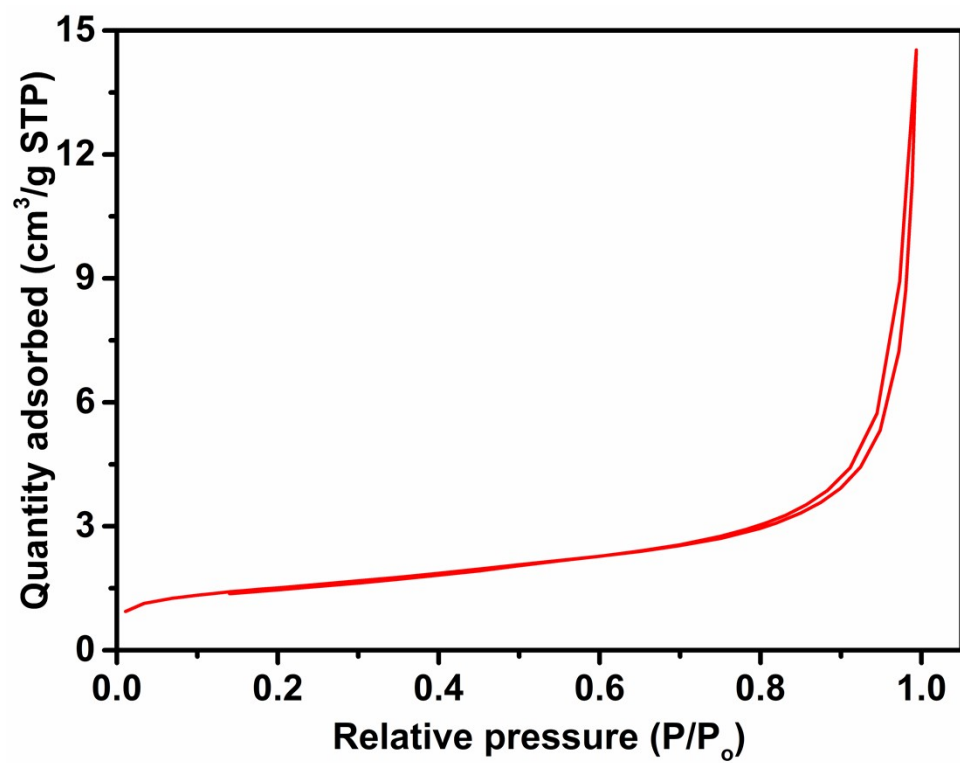

Fig. S3 BET adsorption-desorption curves of 2D polymer.

## 2. Characterization of 2D polymer and (BL)<sub>n</sub> films

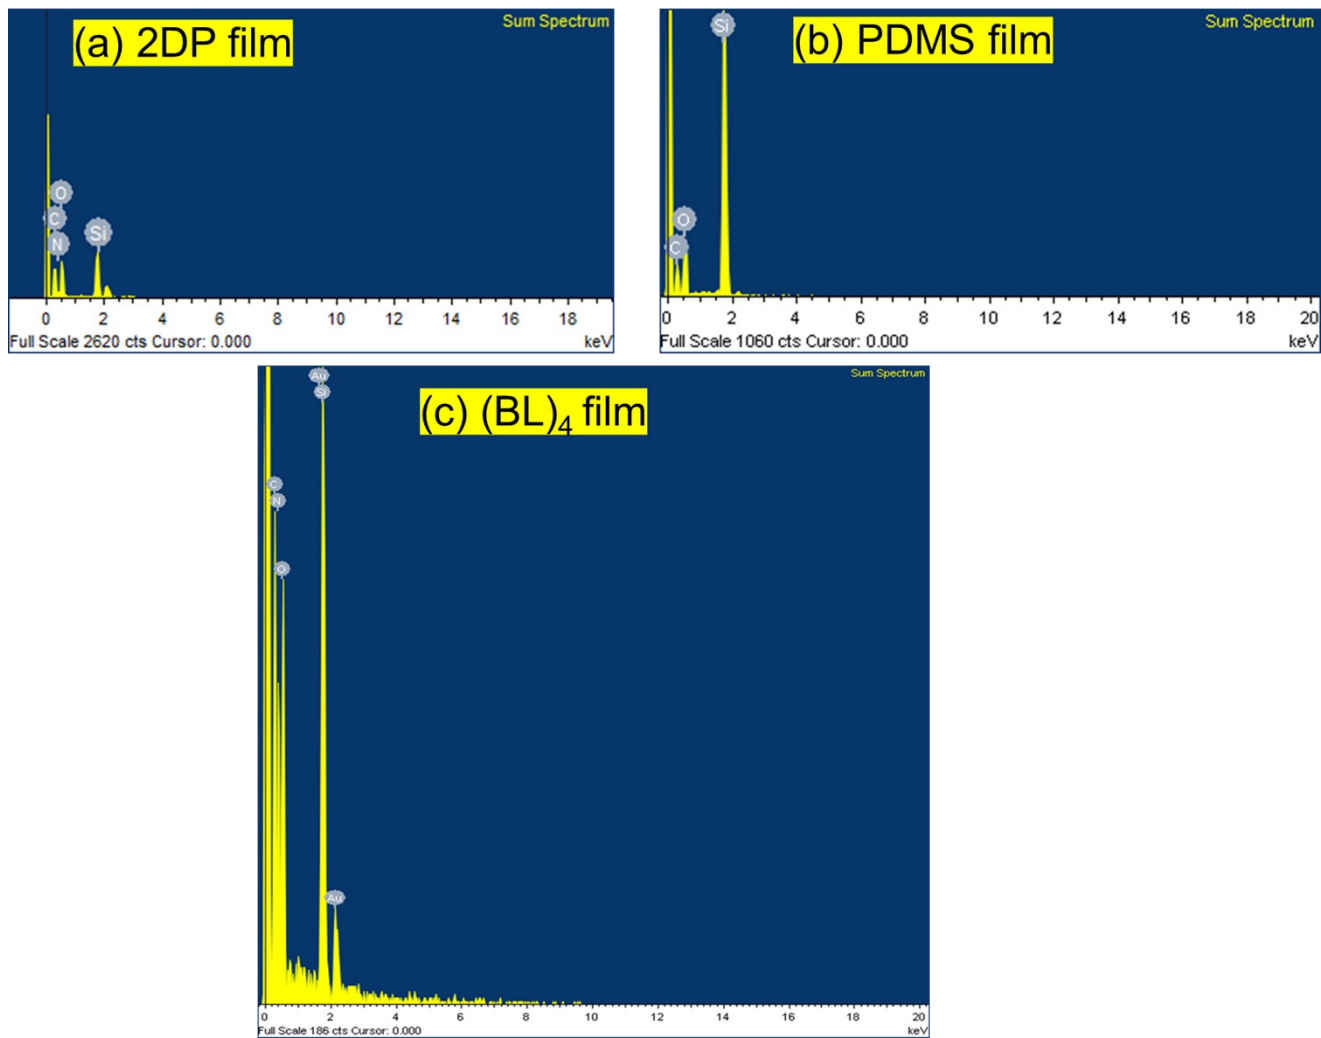

**Fig. S4** EDX profile of (a) 2DP, (b) PDMS, and (c) (BL)<sub>4</sub> films.

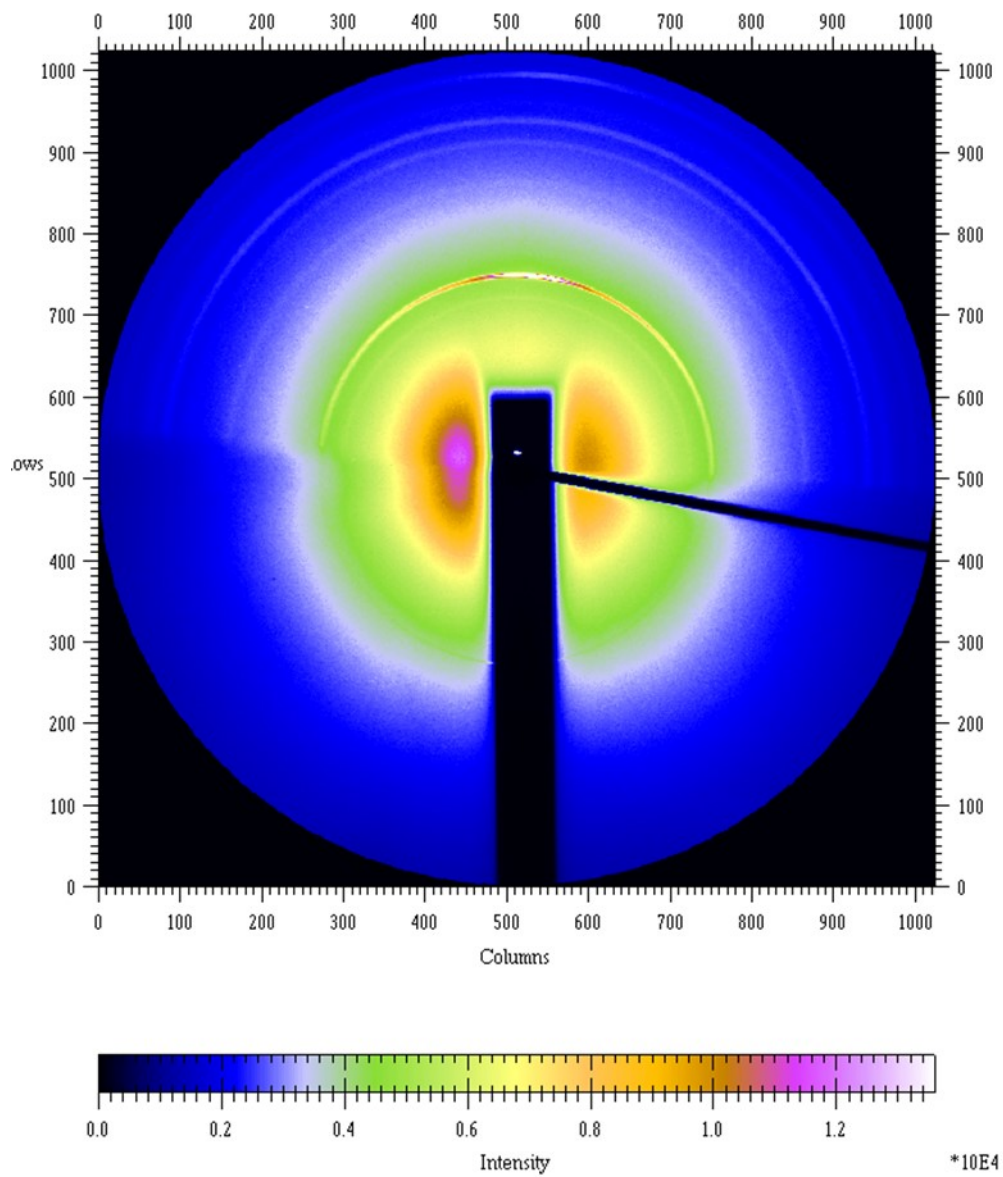

**Fig. S5** 2D profile of 2DP film obtained using GIWAXS.

### 3. Gas barrier properties

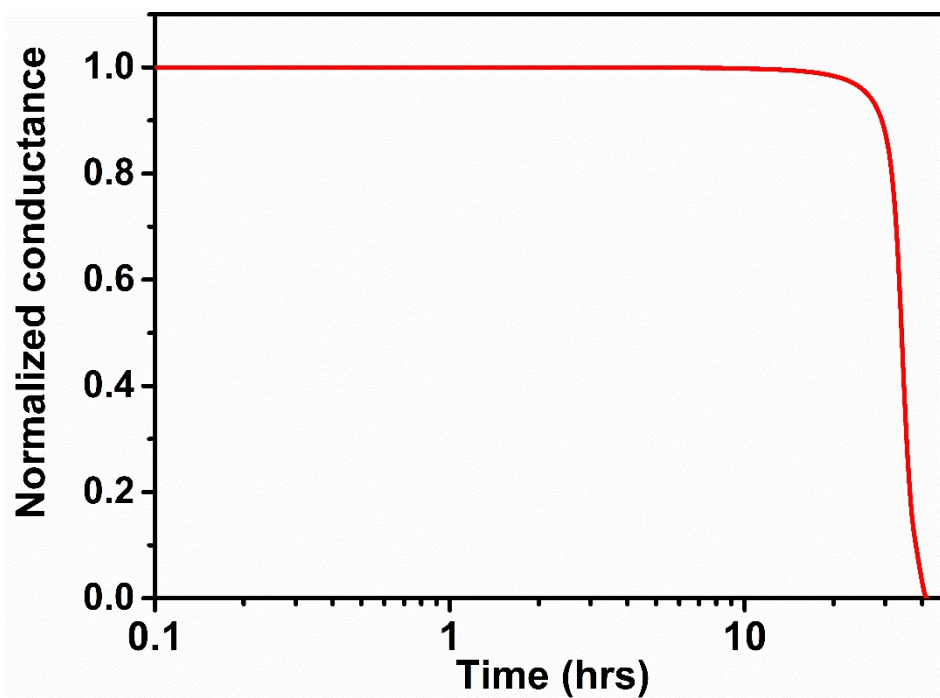

Fig. S6 Graphic plot of normalized conductance vs. time for SB-PDMS/PET/(BL)<sub>4</sub>.

**Table S1. Barrier Properties of Gas-Diffusion-Barrier-Films (GDBFs)**

| <b>GDBFs</b>                  | <b>Lag Time <sup>a</sup><br/>(hours)</b> | <b>Ca Sensor Lifetime<br/>(hours)</b> | <b>WVTR<br/>(g m<sup>-2</sup> day<sup>-1</sup>)</b> |
|-------------------------------|------------------------------------------|---------------------------------------|-----------------------------------------------------|
| PET                           | 0.2                                      | 1                                     | 1.4                                                 |
| PET/2DP                       | 5                                        | 12                                    | 4.0*10 <sup>-2</sup>                                |
| PET/(BL) <sub>1</sub>         | 11                                       | 14                                    | 9.0*10 <sup>-3</sup>                                |
| PET/(BL) <sub>2</sub>         | 15                                       | 22                                    | 6.0*10 <sup>-3</sup>                                |
| PET/(BL) <sub>4</sub>         | 23                                       | 35                                    | 9.0*10 <sup>-4</sup>                                |
| SB-PDMS/PET/(BL) <sub>4</sub> | 25                                       | 37                                    | 8.5*10 <sup>-4</sup>                                |

<sup>a</sup> Lag time: The initial region in the normalized conductance vs. time graph where the conductivity does not change with time.



**Table S2. GDBF Performances (WVTR Values) Reported in Literature**

| GDBFs                                                         | WVTR<br>(g m <sup>-2</sup> day <sup>-1</sup> ) | Film Thickness       | Temperature (°C)<br>& Relative Humidity (RH) | References       |
|---------------------------------------------------------------|------------------------------------------------|----------------------|----------------------------------------------|------------------|
| PI/PDMS                                                       | 1                                              | 38 μm/130 nm         | 40°C & 90 % RH                               | 1                |
| PP/(LDH/PSS) <sub>30</sub>                                    | 1.6 * 10 <sup>-1</sup>                         | 179 μm/65 nm         | 23 °C & 100 % RH                             | 2                |
| PET/PU-Na-hec nanocomposite                                   | <5 * 10 <sup>-2</sup>                          | 100 μm/1.5 μm        | 25 °C & 50 % RH                              | 3                |
| PET/(PEI/VMT) <sub>20</sub>                                   | 6.5 * 10 <sup>-1</sup>                         | 179 μm /160 nm       | 23 °C & 100 % RH                             | 4                |
| PET/(LDH-80/PDMS) <sub>15</sub>                               | 5 * 10 <sup>-2</sup>                           | N.A/12.95 μm         | N.A                                          | 5                |
| APTES@LDH(10%)/PLA                                            | 2.6 * 10 <sup>-2</sup>                         | 60 μm                | 30 °C & 90 % RH                              | 6                |
| PET/(PDDA/h-BN) <sub>30</sub>                                 | 1.3 * 10 <sup>-2</sup>                         | 179 μm/130.6 nm      | 23 °C & 50 % RH                              | 7                |
| PES/(PEI/PMA/PEI/MTM) <sub>5</sub>                            | 3.8 * 10 <sup>-2</sup>                         | 100 μm /50 nm        | 20 °C & 60 % RH                              | 8                |
| PET/PVA-LDH nanocomposite                                     | 4 * 10 <sup>-2</sup>                           | 12 μm/1.1 μm         | 23 °C & 50 % RH                              | 9                |
| PEN/PDDA(GO)/PVA(MMT) <sub>10</sub>                           | 3 * 10 <sup>-3</sup>                           | 125 μm/143 nm        | 23 °C & 50 % RH                              | 10               |
| BOPP/(PEI/VMT) <sub>30</sub>                                  | 1.4                                            | 17.8 μm/ 226 nm      | 23 °C & 100 % RH                             | 11               |
| PDMS/PDDA (GO)/PVA (MMT)                                      | 2.5 * 10 <sup>-2</sup>                         | 300 μm/150 nm        | 23 °C & 50 % RH                              | 12               |
| PET/(PEI/PAA) <sub>50</sub>                                   |                                                | 179 μm/19.5 μm       | 23 °C & 100 % RH                             | 13               |
| PUA <sub>8</sub> PU <sub>2</sub> -PDMS                        | 1.5                                            | 125 μm               |                                              |                  |
| PUA <sub>8</sub> PU <sub>2</sub> -PDMS/(HL) <sub>8</sub>      | 8 * 10 <sup>-3</sup>                           | 125/ 3 μm            | 23 °C & 50 % RH                              | 14               |
| PET/(HL) <sub>8</sub> /PUA <sub>8</sub> PU <sub>2</sub> -PDMS | 7.1* 10 <sup>-3</sup>                          | 123/3/1 μm           |                                              |                  |
| <b>PET/2DP</b>                                                | <b>4*10<sup>-2</sup></b>                       | <b>125 μm/400 nm</b> |                                              |                  |
| <b>PET/(BL)<sub>1</sub></b>                                   | <b>9*10<sup>-3</sup></b>                       | <b>125 μm/1.1 μm</b> | <b>23 °C &amp; 50 % RH</b>                   | <b>This Work</b> |
| <b>PET/(BL)<sub>2</sub></b>                                   | <b>6*10<sup>-3</sup></b>                       | <b>125 μm/1.1 μm</b> |                                              |                  |
| <b>PET/(BL)<sub>4</sub></b>                                   | <b>9*10<sup>-4</sup></b>                       | <b>125 μm/1.1 μm</b> |                                              |                  |

Abbreviations used in Table S2: Polydimethylsiloxane (PDMS), Polyimide (PI), Polyethylenimine (PEI), Polyethylene terephthalate (PET), Vermiculite (VMT), Poly(sodium-p-styrenesulfonate) (PSS), Layered double hydroxides (LDH), Polypropylene (PP), Na<sub>0.5</sub>-fluorohectorite (Na<sub>0.5</sub>(Mg<sub>2.5</sub>Li<sub>0.5</sub>)Si<sub>4</sub>O<sub>10</sub>F<sub>2</sub>, denoted as Na-hec), Polydiallyldimethylammonium (PDDA), Polyurethane (PU), Graphene oxide (GO), Montmorillonite (MMT), Poly(vinyl alcohol) (PVA), Polyethylene naphthalate (PEN), 3-Aminopropyltriethoxysilane (APTES), Polylactic acid (PLA), LDH nanoplatelets modified by APTES (APTES@LDH), Montmorillonite (MTM), Hexagonal boron nitride (h-BN), Poly(methyl acrylic acid) (PMA), Biaxially oriented polypropylene (BOPP), Poly(ethersulfone) (PES), Amphiphilic surfactant (Tween 80) modified LDH nanoplatelets (denoted as LDH-80).

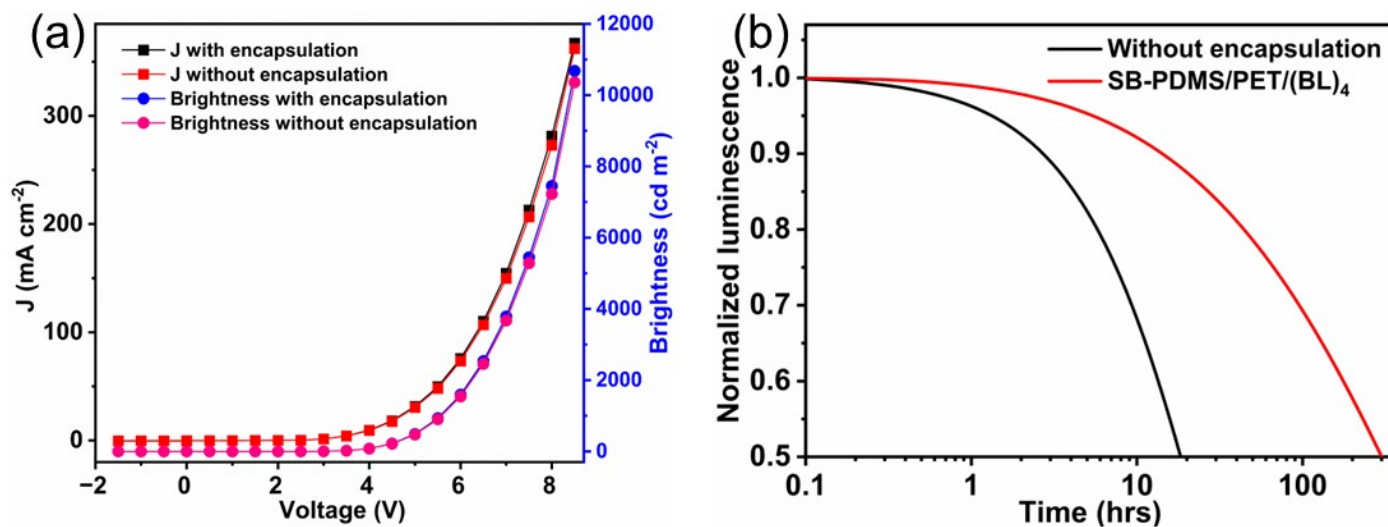

**Fig. S7** (a) Initial performances (current density-voltage-luminescence (J-V-L) characteristics) of OLED devices with/without encapsulation and (b) Performance degradation curves of normalized luminescence ( $\approx 1000 \text{ Cd m}^{-2}$ ) versus continuous operation time (up to half-lifetime  $L_{50} \approx 300 \text{ h}$ ) for OLED devices with/without encapsulation of SB-PDMS/PET/(BL)<sub>4</sub>.

## References

- 1 T. Sasaki, L. Sun, Y. Kurosawa, T. Takahashi and Y. Suzuri, *Adv. Mater. Interfaces*, 2022, **2201517**, 1–8.
- 2 J. Wang, X. Xu, J. Zhang, M. Chen, S. Dong, J. Han and M. Wei, *ACS Appl. Mater. Interfaces*, 2018, **10**, 28130–28138.
- 3 D. A. Kunz, J. Schmid, P. Feicht, J. Erath, A. Fery and J. Breu, *ACS Nano*, 2013, **7**, 4275–4280.
- 4 M. A. Priolo, K. M. Holder, S. M. Greenlee and J. C. Grunlan, *ACS Appl. Mater. Interfaces*, 2012, **4**, 5529–5533.
- 5 J. Wang, T. Pan, J. Zhang, X. Xu, Q. Yin, J. Han and M. Wei, *RSC Adv.*, 2018, **8**, 21651–21657.
- 6 Z. Yang, K. Shi, Z. Jin, Z. Liu, Y. Li, Y. Huang, F. Gao and J. Han, *Ind. Eng. Chem. Res.*, 2022, **61**, 1367–1374.
- 7 T. Y. Kim, E. H. Song, B. H. Kang, S. J. Kim, Y. H. Lee and B. K. Ju, *Nanotechnology*, 2017, **28**, 12LT01.
- 8 J. H. Choi, Y. W. Park, T. H. Park, E. H. Song, H. J. Lee, H. Kim, S. J. Shin, V. Lau Chun Fai and B. K. Ju, *Langmuir*, 2012, **28**, 6826–6831.
- 9 J. Yu, K. Ruengkajorn, D. G. Crivoi, C. Chen, J. C. Buffet and D. O’Hare, *Nat. Commun.*, 2019, **10**, 1–8.
- 10 S. J. Kim, T. Y. Kim, B. H. Kang, G. H. Lee and B. K. Ju, *RSC Adv.*, 2018, **8**, 39083–39089.
- 11 Y. Song, P. Tzeng and J. C. Grunlan, *Macromol. Rapid Commun.*, 2016, **37**, 963–968.
- 12 S. J. Kim, T. Kim, D. Kim and B. K. Ju, *Appl. Sci.*, , DOI:10.3390/app11135794.
- 13 Y. H. Yang, L. Bolling, M. Haile and J. C. Grunlan, *RSC Adv.*, 2012, **2**, 12355–12363.
- 14 S. Mahmood, A. Khan, C. Kant, C. W. Chu, M. Katiyar and H. C. Lin, *Adv. Mater. Interfaces*, DOI:10.1002/admi.202202093.
